# Supplementary material for: The non-canonical Notch signaling is essential for the control of fertility in Aedes aegypti
Source: PubMed Central journal article supplement (PMC5854436; doi:10.1371/journal.pntd.0006307), 2018-03-05
Supplement: pntd.0006307.s007.pdf [file pntd.0006307.s007.pdf]

S1 Table. Gene accession numbers and primers used in this study

| Primer         | Vector Base ID | Forward sequence<br>(5' → 3')                | Reverse sequence<br>(5' → 3')                 | Annealing temp.<br>(°C) | Size (bps) |
|----------------|----------------|----------------------------------------------|-----------------------------------------------|-------------------------|------------|
| Notch RNAi     | AAEL001210     | TAATACGACTCACTATAGGGACGTG<br>GTTCCCAGAAGGATT | TAATACGACTCACTATAGGGCCCAG<br>TCTTATCCATGGTTCG | 60.5                    | 528        |
| Notch<br>qPCR  | AAEL001210     | ATCGGGATGCTCAAGATGAC                         | TGATCATCCGAAATCTGCAC                          | 51                      | 466        |
| Delta RNAi     | AAEL011396     | TAATACGACTCACTATAGGGGGATA<br>TAGCGGTACTCGATG | TAATACTACTCACTATAGGGGTCAT<br>CTTTCTCCTGCTCAC  | 60.5                    | 591        |
| Delta<br>qPCR  | AAEL011396     | ACTACCTCACGATCACCAGA                         | GGATAGGGTTCACACTCGT                           | 51                      | 366        |
| CSL RNAi       | AAEL006419     | TAATACGACTCACTATAGGGACGA<br>GAGCGAGTCAGAGGAG | TAATACGACTCACTATAGGGCGTGA<br>AAGTTAGCCCCGTAG  | 60.5                    | 647        |
| CSL CHK        | AAEL006419     | CCACCCA ACTATGTGCCTTT                        | ACATCCGTTCCGGTGTCTTTC                         | 50                      | 606        |
| SPM779<br>qPCR | AAEL008779     | TCCTTGTGGACCCTGTGTAA                         | AATCTGTGGCTTCAGTTGG                           | 53                      | 499        |
| KLC2.2<br>qPCR | AAEL021010     | CCCGAAGCCATTAAACAC                           | TGATTCACTGTCACCATTCTGTAC                      | 55                      | 465        |
| S7 qPCR        | AAEL009496     | GAAAAGATGGCATGGGAAGTG                        | CTCCTGCTTCCGTTTGATTACC                        | 52                      | 69         |
| Jun qPCR       | AAEL003505     | CTCCATGCGCGAAAAAGATA                         | TGTGTAGTTCGTTGTTCGT                           | 54                      | 261        |
| P38 qPCR       | AAEL008379     | CCCAGTCCTTAAAGGCACG                          | CGCTTAAGGCCCTTAGAGATT                         | 56                      | 267        |
| EGFR<br>qPCR   | AAEL004391     | ACCCTTTGGATATAACCCGCG                        | GCCTATTGGCCCGTGTGGGAAT                        | 56                      | 289        |
